# Supplementary material for: Strategic Impression Management: Responding to Compliments
Source: Research Square preprint supplement (doi:10.21203/rs.3.rs-7151628/v1), 2025-08-11
Supplement: Supplementary file 1 [file 55b016610ff2177a46b83acb.docx]

**Supplementary Materials**

**for**

**Strategic Impression Management: Responding to Compliments**

1. **Vignette and Compliment Responses**……...............................................................................2

2. **All Assessed Responses**..............................................................................................................4

Table S1...........................................................................................................................................4

Table S2...........................................................................................................................................6

3. **Three-way Interaction**...............................................................................................................7

4. **Domain Analysis**……................................................................................................................8

Table S3...........................................................................................................................................8

**Vignettes and Compliment Responses**

*Experiment 1*

Vignette: A few weeks ago, you met Alex through one of your close friends.

Alex is just really cool, fun, smart. He/She also seems really nice, and although you don’t know Alex too well, you absolutely want the two of you to become friends.

Today, you run into Alex when you’re running errands.

Compliment SSO Receives:

Appearance: “Hi! It’s so great running into you. I’m running late, but I just wanted to say hi. Also, I love your shoes.”

Niceness: “Hi! It’s so great running into you. I’m running late, but I just wanted to say hi. Also, you always seem like such a generous caring person.”

Expertise: YOU: “Hi! It’s so great running into you. I’m running late, but I just wanted to say hi. Also, you always seem like you're such a badass boss!”

Job: “Hi! It’s so great running into you. I’m running late, but I just wanted to say hi. Also, congratulations on the new promotion! I heard you beat out a bunch of people; you really earned that office and pay raise.”

Responses:

Appearance:

Boast: I know, they really are. I am really good at styling; aren’t I?

Reflect: Thanks, I love yours!

Deflect: Oh no, they’re just old and whatever.

Neutral: Thank you.

Niceness:

Boast: I know, I really am such a generous caring person. I am really great; aren't I?

Reflect: Thanks! But *you*always seem like such a generous and caring person.

Deflect: Oh no, you know I am usually a grumpy monster. You must have caught me on a good day.

Neutral: Thank you.

Expertise:

Boast: I know, I am really a badass boss; aren't I?

Reflect: Thanks, but you always seem like such a badass boss.

Deflect: Oh gosh me?! I am not. I can barely tie my shoes in the morning.

Neutral: Thank you.

Job:

Boast: I know, I am really am the best; aren't I?

Reflect: Thanks, but I hear you are just killing it at work.

Deflect: Oh, no! I just got lucky. I hope they don't fire me tomorrow!

Neutral: Thank you.

*Experiment 2*

Vignette: A few weeks ago, you met Alex through one of your close friends.

Alex is just really cool, fun, smart. He/She also seems really nice, and although you don’t know Alex too well, you absolutely want the two of you to become friends.

Today, you run into Alex when you’re running errands.

Compliment SSO Gives:
Appearance: “Hi! It’s so great running into you. I’m running late, but I just wanted to say hi. Also, I love your shoes.”

Job: “Hi! It’s so great running into you. I’m running late, but I just wanted to say hi. Also, congratulations on the new promotion! I heard you beat out a bunch of people; you really earned that office and pay raise.”

Responses:

Appearance:

Boast: I know, they really are. I am really good at styling; aren’t I?

Reflect: Thanks I love yours!

Deflect: Oh no, they’re just old and whatever.

Neutral: Thank you.

Job:

Boast: I know, I am really am the best; aren't I?

Reflect: Thanks, but I hear you are just killing it at work.

Deflect: Oh, no! I just got lucky. I hope they don't fire me tomorrow!

Neutral: Thank you.

**All Assessed Responses**

Our main outcome variables were participants’ ratings of being perceived as or perceiving a same-sex other as likable, arrogant, warm, and wanting to initiate a friendship. They were measured alongside multiple distractor items. The Means and SEs for each distractor item for every experiment are presented below in Tables S1-S2.

**Table S1**

*Experiment 1: Judgments by each sex for all dependent variables across domains*

| Physically Attractive | | | | |
| --- | --- | --- | --- | --- |
| Participant Sex | Boast | Reflect | Deflect | Neutral |
| Male  (*n*=164) | 30.69(1.95) | 41.54(2.09) | 36.15(1.92) | 37.79(1.85) |
| Female  (*n*=507) | 27.95(1.12) | 44.48(1.20) | 34.96(1.10) | 36.79(1.06) |
| *F* | 1.48 | 1.48 | .29 | .22 |

| Competent | | | | |
| --- | --- | --- | --- | --- |
| Participant Sex | Boast | Reflect | Deflect | Neutral |
| Male  (*n*=164) | 40.62(1.77) | 58.66(1.61) | 50.00(1.73) | 51.17(1.75) |
| Female  (*n*=507) | 36.74(1.01) | 61.24(.92) | 47.30(.99) | 48.17(.99) |
| *F* | 3.61 | 1.94 | 1.85 | 1.54 |

| Cool | | | | |
| --- | --- | --- | --- | --- |
| Participant Sex | Boast | Reflect | Deflect | Neutral |
| Male  (*n*=164) | 33.68(1.93) | 67.79(1.70) | 53.95(2.11) | 45.77(1.95) |
| Female  (*n*=507) | 25.93(1.11) | 71.24(.97) | 49.05(1.21) | 43.48(1.12) |
| *F* | 12.20*** | 3.10 | 4.08* | 1.05 |
| Useful | | | | | |
| Participant Sex | | Boast | Reflect | Deflect | Neutral |
| Male  (*n*=164) | | 33.08(1.85) | 64.38(1.75) | 49.65(2.10) | 48.02(1.92) |
| Female  (*n*=507) | | 24.29(1.06) | 68.50(1.00) | 45.27(1.20) | 45.91(1.10) |
| *F* | | 16.95*** | 4.20* | 3.27 | .92 |
| Beneficial | | | | | |
| Participant Sex | | Boast | Reflect | Deflect | Neutral |
| Male  (*n*=164) | | 32.23(1.87) | 66.41(1.72) | 50.65(2.12) | 48.57(1.89) |
| Female  (*n*=507) | | 24.50(1.07) | 70.75(.98) | 46.90(1.22) | 46.12(1.08) |
| *F* | | 12.81*** | 4.80* | 2.37 | 1.28 |

*Note*. ***p < .001, **p < .01, *p < .05

**Table S2**

*Experiment 2: Judgments by each sex for all dependent variables across domains*

| Physically Attractive | | | | |
| --- | --- | --- | --- | --- |
| Participant Sex | Boast | Reflect | Neutral | Deflect |
| Male  (*n*=98) | 27.80(2.16) | 38.21(2.54) | 28.83(2.16) | 33.54(2.41) |
| Female  (*n*=394) | 21.01(1.08) | 37.45(1.27) | 25.15(1.07) | 28.90(1.20) |
| *F* | 7.88** | .07** | 2.33 | 2.96 |

| Competent | | | | |
| --- | --- | --- | --- | --- |
| Participant Sex | Boast | Reflect | Neutral | Deflect |
| Male  (*n*=98) | 39.60(2.47) | 64.28(2.59) | 43.08(2.21) | 56.91(2.59) |
| Female  (*n*=394) | 31.61(1.23) | 52.67(1.29) | 33.66(2.06) | 45.30(1.29) |
| *F* | 26.23*** | 10.73** | 22.36*** | 18.16*** |

| Cool | | | | |
| --- | --- | --- | --- | --- |
| Participant Sex | Boast | Reflect | Neutral | Deflect |
| Male  (*n*=98) | 30.16(2.05) | 63.17(2.17) | 44.35(2.21) | 47.83(2.36) |
| Female  (*n*=394) | 21.76(1.02) | 62.81(1.08) | 35.70(1.10) | 41.71(1.17) |
| *F* | 13.49*** | .02 | 12.20** | 5.39* |
| Useful | | | | | |
| Participant Sex | | Boast | Reflect | Neutral | Deflect |
| Male  (*n*=98) | | 28.28(2.06) | 63.91(2.43) | 46.00(2.18) | 46.83(2.38) |
| Female  (*n*=394) | | 20.62(1.03) | 64.05(1.21) | 35.54(1.09) | 42.23(1.18) |
| *F* | | 11.09** | .01 | 18.36 | 2.99 |
| Beneficial | | | | | |
| Participant Sex | | Boast | Reflect | Neutral | Deflect |
| Male  (*n*=98) | | 27.49(2.04) | 64.64(2.42) | 47.02(2.16) | 47.33(.18) |
| Female  (*n*=394) | | 20.04(1.02) | 65.59(1.21) | 36.34(1.08) | 42.92(1.18) |
| *F* | | 10.63*** | .52** | 19.49*** | 2.79 |

*Note*. ***p < .001, **p < .01, *p < .05

**Three-Way Interactions**

Our primary analysis examined **sex differences in focal trait perceptions** in response to compliments, which varied by domain. The three-way interaction between**sex, domain, and response**was**not significant**for**Experiment 1** *ps*>.490. However, for **Experiment 2,** the interaction was **significant** *F*(12,454)=2.022,*p*=.021,ηp2=.051. For **arrogance** and **desire to initiate a friendship, no significant sex differences**emerged *p*>.119. In contrast, significant three-way interactions were found for **warmth** *F*(3,1395)=2.911,*p*=.033, and liking *F*(3,1395)=6.640,*p*<.001 when boasting. For **warmth**, the significant difference occurred in the **appearance domain**, where **men** (*M*=37.97,*SE*=1.51) expected to be perceived as warmer than women (*M*=32.70,*SE*=1.80). Similarly for liking, sex differences appeared in the appearance domain with men expecting to be more liked than women (*M*=26.59,*SE*=0.90). These results suggest that women anticipate being perceived as less warm and less liked when they boast in the appearance domain.

**Domain Analyses**

While our primary analyses centered on response type, we also examined whether the domain of the compliment shaped participants’ perceptions across four key dependent variables: arrogance, warmth, liking, and friendship intentions. Refer to Table S3 for detailed descriptive statistics by domain.

In Experiment 1, we conducted one-way ANOVAs across all response types and followed with two-way ANOVAs testing for interactions between compliment domain (Appearance, Niceness, Expertise, Job) and participant sex. We found significant main effects of domain across all four traits (*ps*<.001), indicating that perceptions varied meaningfully depending on the topic of the compliment. However, there were no significant interactions between domain and participant sex for any outcome (all *ps*>.09), suggesting that the influence of compliment domain on trait perceptions was consistent across men and women.

In Experiment 2, we narrowed the focus to two domains (Appearance and Job) and used a repeated-measures design. Once again, domain-level effects emerged across most outcomes. Compliments in the job domain were rated more favorably than those in the appearance domain, specifically on perceptions of warmth, liking, and friendship intentions. Arrogance ratings, by contrast, did not differ by domain. As in Experiment 1, there were no significant main effects of sex or Domain × Sex interactions, reinforcing that the effects of compliment domain on social perception were stable across participant sex.

**Table S3**

*Perceptions by Compliment Domain*

| Experiment 1 | | | | |
| --- | --- | --- | --- | --- |
| Domain | Arrogance | Warmth | Liking | Friendship |
| Appearance | 44.29(0.75) | 49.72(0.93) | 42.50(1.18) | 48.97(1.09) |
| Niceness | 43.00(0.68) | 40.13(0.98) | 40.13(1.30) | 47.10(1.08) |
| Expertise | 37.98(0.77) | 55.87(1.02) | 46.70(1.43) | 55.89(1.16) |
| Job | 39.90(0.81) | 52.45(1.15) | 37.03(1.46) | 46.41(1.21) |
| *F* | 70.07*** | 24.90*** | 27.39*** | 38.30*** |
| Experiment 2 | | | | |
| Domain | Arrogance | Warmth | Liking | Friendship |
| Appearance | 35.23(0.38) | 46.68(0.67) | 36.91(0.86) | 43.92(0.77) |
| Job | 35.31(0.39) | 48.09(0.64) | 38.81(0.87) | 46.65(0.75) |
| *F* | 1.05 | 7.21** | 9.38** | 22.49*** |

*Note*: * p < .05, ** p < .01, *** p < .001
